# Supplementary material for: Genomics versus mtDNA for resolving stock structure in the silky shark ( Carcharhinus falciformis )
Source: PeerJ journal article supplement (doi:10.7717/peerj.10186), 2020-10-21

Clarke 2015

Pool-Seq

14 < MAC 3

3 > MAC 3

17

1

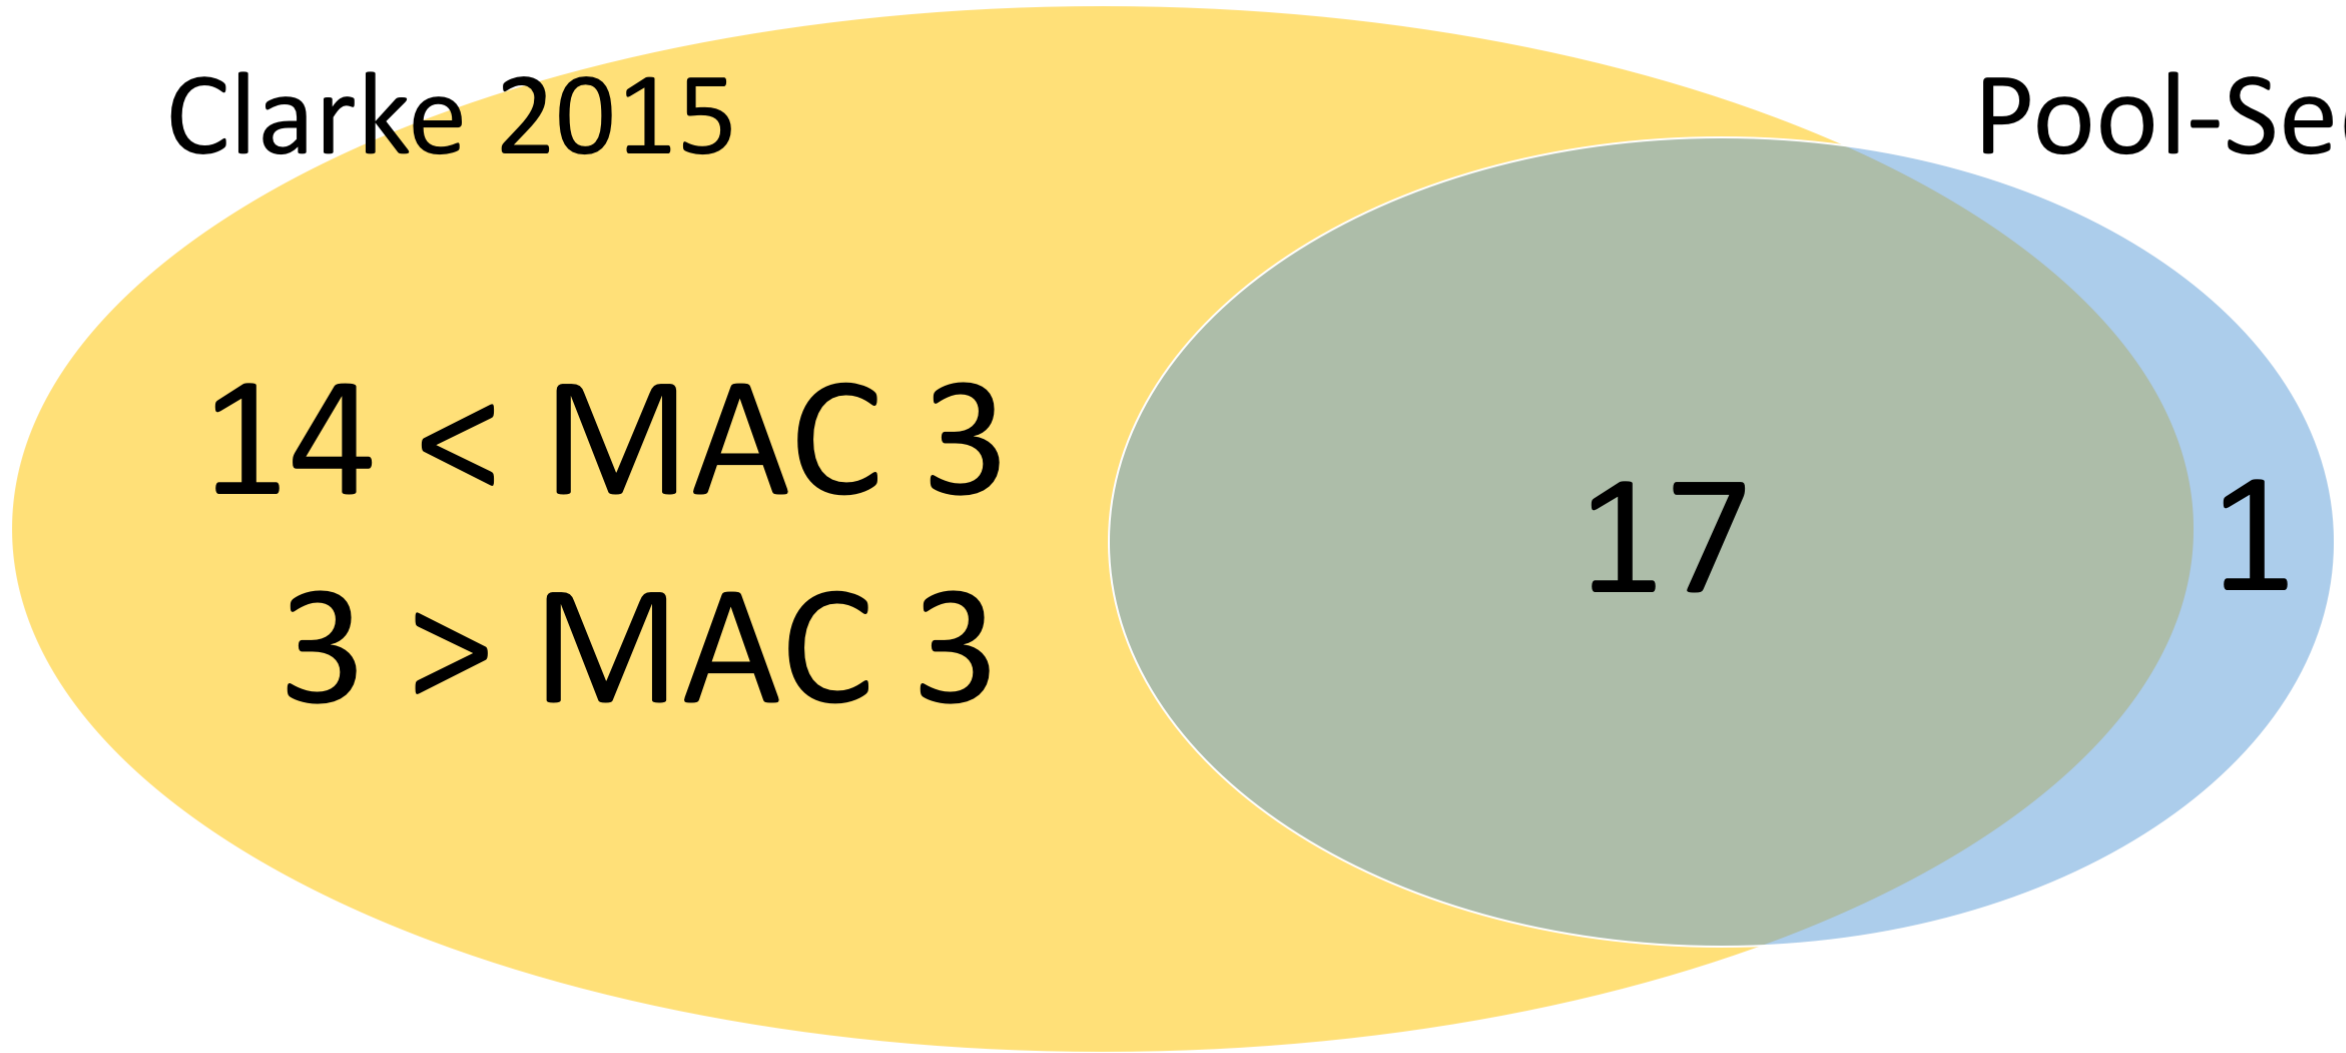

Supplement: Supplemental_Figure_1.pdf [file Supplemental_Figure_1.pdf]
